# Supplementary material
Source: PubMed Central journal article supplement (PMC2582005)
Supplement: blood-2008-05-157974_1.pdf [file blood-2008-05-157974_1.pdf]

|                                           | Histology (ICDO-2)           |     |
|-------------------------------------------|------------------------------|-----|
| Non-Hodgkin Lymphoma (NHL)                |                              | 104 |
| B-cell NHL                                |                              | 85  |
| Diffuse Large B-Cell Lymphoma             | 9680, 9683, 9684             | 24  |
| Marginal zone lymphoma                    | 9760                         | 1   |
| Follicular Lymphoma                       | 9690, 9692, 9695, 9697, 9698 | 11  |
| CLL / SLL                                 | 9670, 9823                   | 34  |
| Chronic Lymphocytic leukemia              | 9823                         | 21  |
| Small Lymphocytic Lymphoma                | 9670                         | 13  |
| Mantle Cell Lymphoma                      | 9673, 9674, 9677             | 9   |
| Other B-cell NHL                          |                              | 6   |
| Waldenstrom macroglobulinemia             | 9761                         | 1   |
| Burkitt                                   | 9687, 9826                   | 2   |
| Hairy cell                                | 9940                         | 3   |
| T-cell NHL                                |                              | 12  |
| Peripheral T-cell lymphoma/leukemia       | 9702, 9707, 9714             | 8   |
| Mycosis fungoides                         | 9700                         | 4   |
| Precursor Lymphoblastic Lymphoma/Leukemia | 9685, 9821                   | 1   |
| NOS NHL                                   | 9591, 9592, 9672, 9676, 9686 | 6   |
